# Supplementary material for: Tumor-Derived Microvesicles Modulate Antigen Cross-Processing via Reactive Oxygen Species-Mediated Alkalinization of Phagosomal Compartment in Dendritic Cells
Source: PubMed Central journal article supplement (PMC5622295; doi:10.3389/fimmu.2017.01179), 2017-09-25
Supplement: Image_2.pdf [file Image_2.pdf]

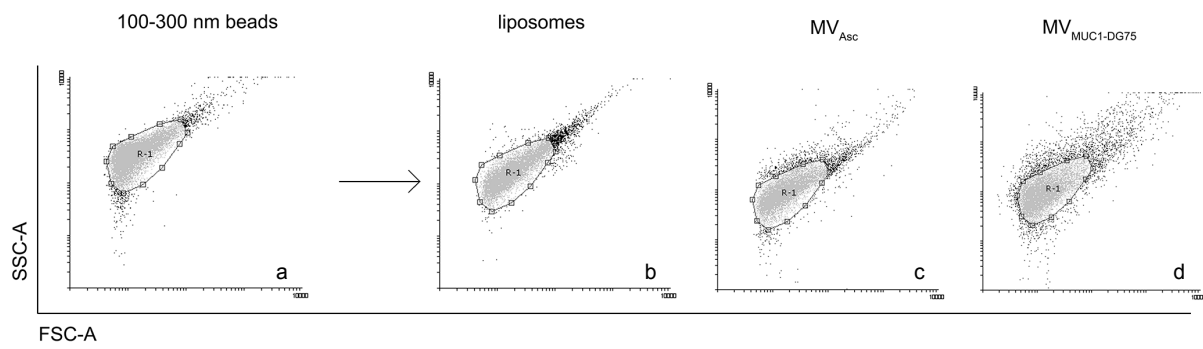

**Supplementary Figure 2: Analysis of Liposomes and tumor derived MVs by flow cytometry**

Fluorescent Nile Red particles with size between 100-300 nm were used as reference (panel a) for the gating of Liposomes and microvesicle samples. Gating of Liposomes (panel b), MV<sub>Asc</sub> (panel c) and MV<sub>MUC1-DG75</sub> (panel d). Results are reported in dot plot. x axis: FSC-A; y axis: SSC-A.
