# Supplementary material for: Tumor-Derived Microvesicles Modulate Antigen Cross-Processing via Reactive Oxygen Species-Mediated Alkalinization of Phagosomal Compartment in Dendritic Cells
Source: PubMed Central journal article supplement (PMC5622295; doi:10.3389/fimmu.2017.01179), 2017-09-25
Supplement: Image_3.pdf [file Image_3.pdf]

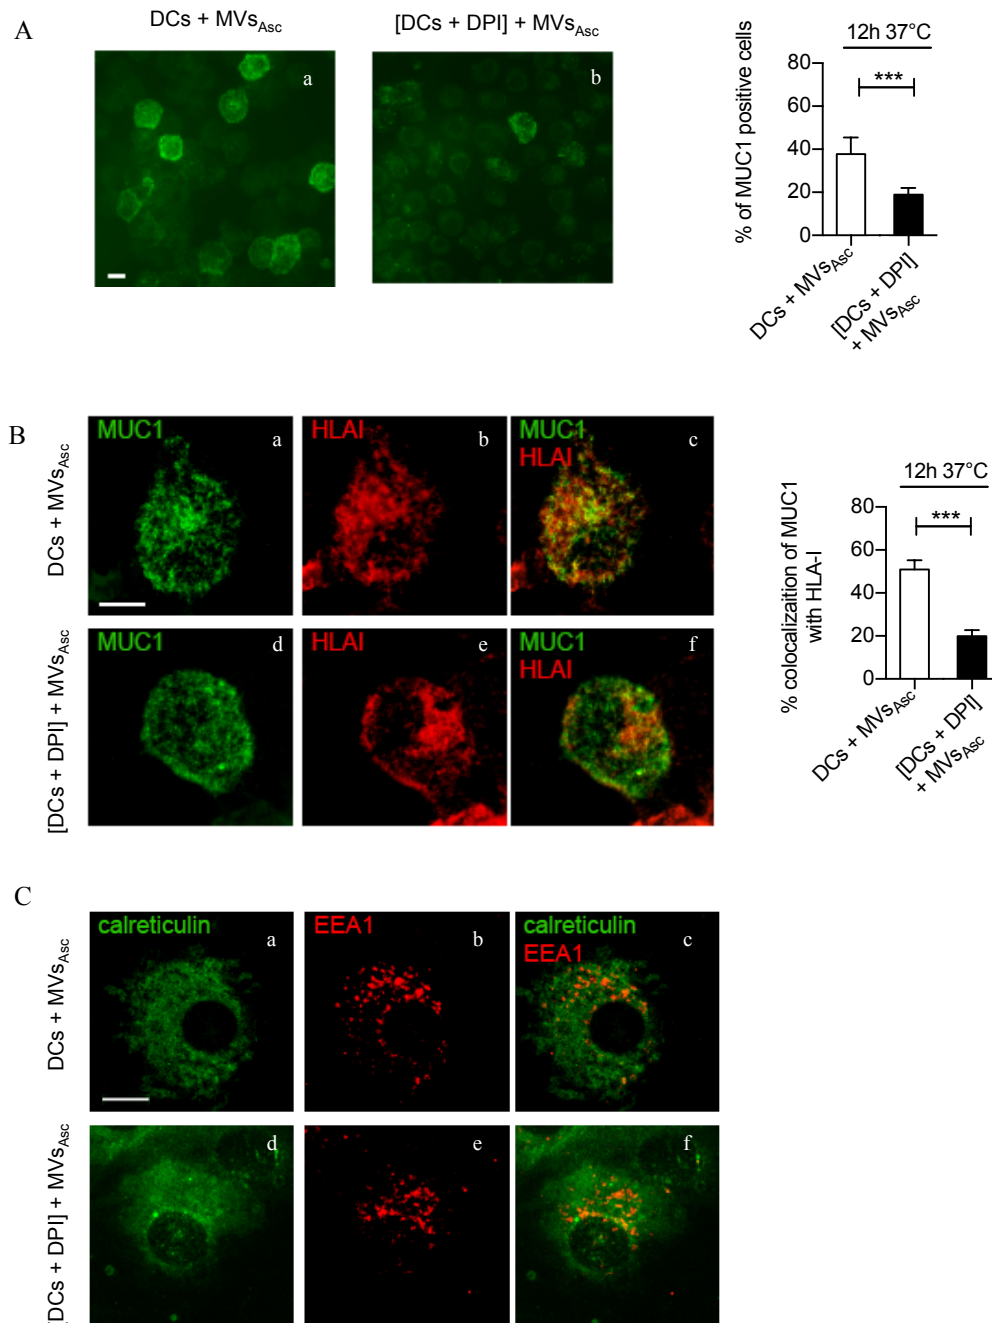

### Supplementary Figure 3: DPI-treated DCs shows a modified MUC1 distribution

A) Intracellular localization of MUC1 carried by MVs<sub>ASC</sub> in DCs (a) and in DPI-treated DCs (b) was visualized by immunofluorescence staining after 12 hours of internalization employing the anti-MUC1 MoAb Ma552. The percentage of MUC1<sup>+</sup> DCs was calculated analyzing 5 different experiments. Results are expressed as mean values  $\pm$  SD. Student *t test* was performed and significance level has been defined as \*\*\* $p < 0.005$  versus the corresponding DPI-untreated DCs.

B) Intracellular localization of MUC1 carried by MVs<sub>ASC</sub> in DCs (a-c) and in DPI-treated DCs (d-f) was visualized by immunofluorescence staining after 12 hours of internalization employing the anti-MUC1 MoAb Ma552 (green, a, c, d and f) and the anti-HLA-I MoAb W6/32 (culture supernatant; red, b, c, e and f). Colocalization of the immunofluorescence signals is shown (yellow, c and f). Quantitative analysis of colocalization was calculated as reported in materials and methods and plotted as histograms. Results are expressed as mean values  $\pm$  SD. Student *t test* was performed and significance level has been defined as  $p < 0.05$ . \*\*\* $p < 0.005$ . Bar: 10  $\mu$ m.

C) Intracellular localization of Calreticulin and EEA1 in DCs (a-c) and in DPI-treated DCs (d-f) pulsed with MVs<sub>ASC</sub> was visualized by immunofluorescence staining after 12 hours of internalization employing anti-calreticulin polyclonal antibody (green, a, c, d and f) and anti-EEA1 MoAb (red, b, c, e and f). No colocalization was observed. Bar: 10  $\mu$ m.
